# Supplementary material for: Glucocorticoid receptor and nuclear factor kappa-b affect three-dimensional chromatin organization
Source: PubMed Central journal article supplement (PMC4665721; doi:10.1186/s13059-015-0832-9), 2015-12-01

# Supplementary Fig. 9

## PTPN1

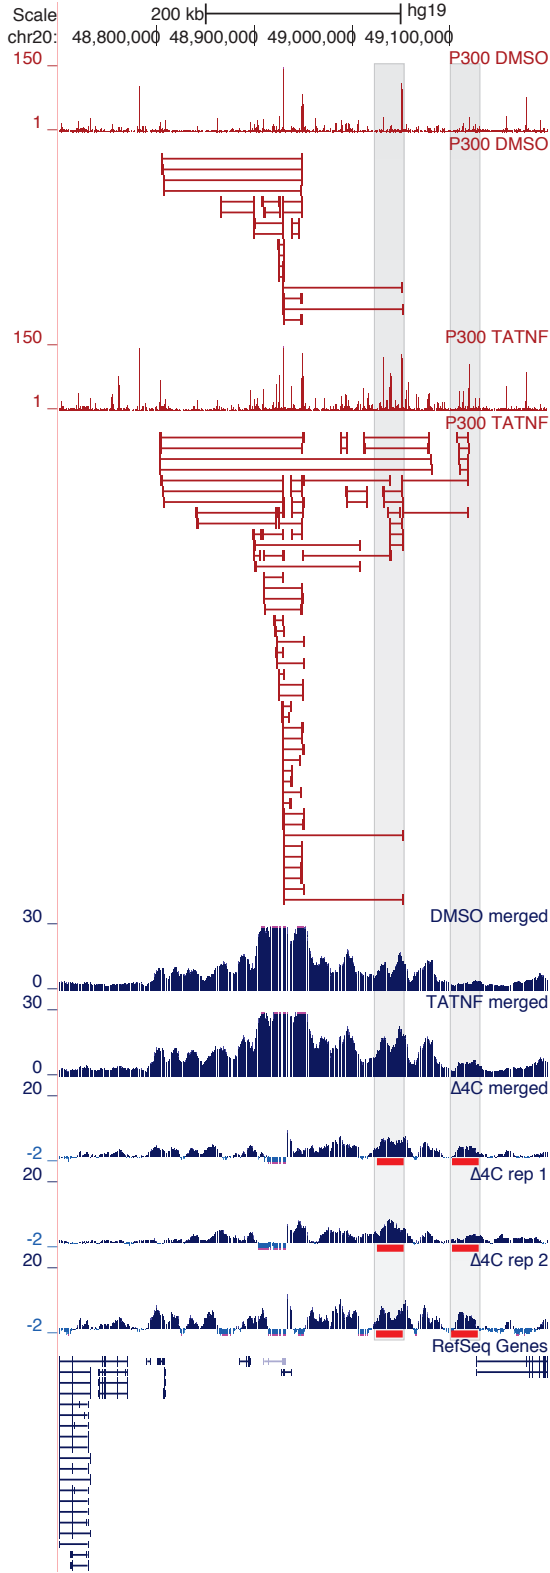

## SULF1

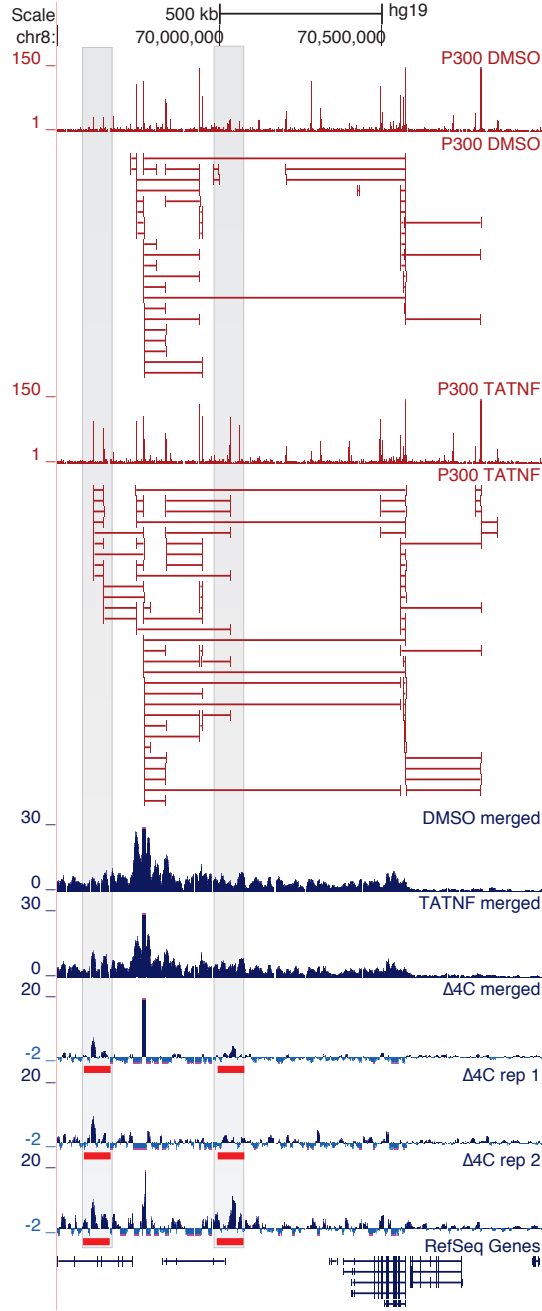

## ZFHX3

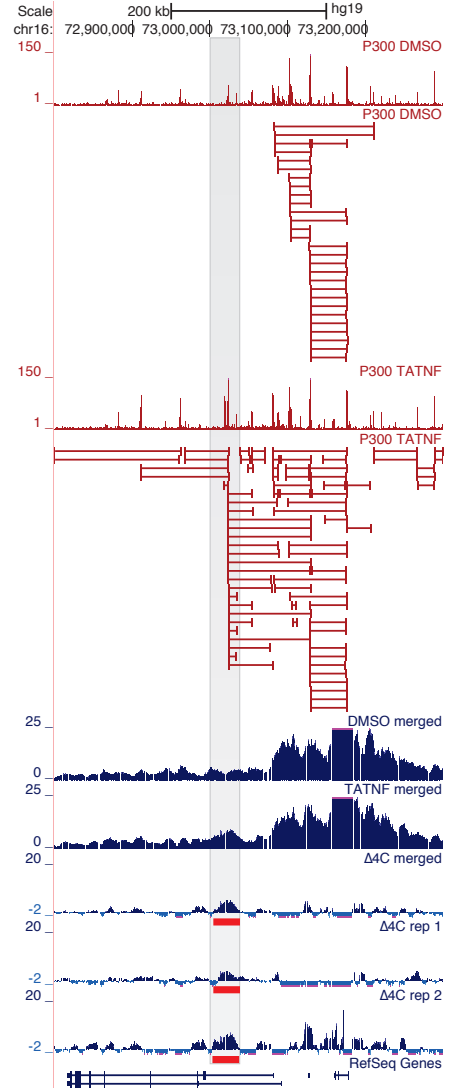

Supplement: 13059_2015_832_MOESM12_ESM.pdf [file 13059_2015_832_MOESM12_ESM.pdf]
